# Supplementary material
Source: HighWire-hosted journal article supplement (https://bmjopen.bmj.com/content/10/10/e040022)
Supplement: inline-supplementary-material-4 [file inline-supplementary-material-4.pdf]

|                     |   |   |   |   |   |   |   |   |   |   |   |   |   |   |   |   |
|---------------------|---|---|---|---|---|---|---|---|---|---|---|---|---|---|---|---|
| Petrou, S (2011)    | 7 | 4 | 8 | 0 | 9 | 6 | 5 | 7 | 8 | 6 | 7 | 8 | 7 | 6 | 8 | 3 |
| Eddama, O (2010)    | 7 | 0 | 8 | 0 | 9 | 6 | 5 | 7 | 8 | 6 | 7 | 8 | 0 | 0 | 8 | 0 |
| Jit, M (2010)       | 0 | 0 | 8 | 0 | 9 | 6 | 5 | 7 | 8 | 6 | 7 | 8 | 0 | 0 | 8 | 3 |
| Round, JA (2011)    | 7 | 0 | 8 | 0 | 9 | 6 | 5 | 7 | 8 | 6 | 7 | 8 | 7 | 0 | 8 | 3 |
| Schroeder, E (2012) | 7 | 0 | 0 | 1 | 9 | 6 | 5 | 7 | 8 | 6 | 7 | 8 | 0 | 0 | 8 | 3 |
| Essex, HN (2015)    | 7 | 4 | 8 | 0 | 0 | 6 | 0 | 7 | 8 | 6 | 7 | 8 | 7 | 0 | 8 | 3 |
| Total (Max 100)     |   |   |   |   |   |   |   |   |   |   |   |   |   |   |   |   |
| Overall assessment  |   |   |   |   |   |   |   |   |   |   |   |   |   |   |   |   |

1. Was the study objective presented in a clear, specific and measurable manner? (Y/N)

2. Were the perspective of the analysis (societal, third-party payer, etc) and reasons for its selection stated? (Y/N)

3. Were variable estimates used in the analysis from the best available source (i.e randomized control trial - best, expert opinion - worst)? (Y/N)

4. If estimates came from a subgroup analysis, were the groups prespecified in the beginning of the study? (Y/N)

5. Was uncertainty handled by (1) statistical analysis to address random events, (2) sensitivity analysis to cover a range of assumptions? (Y/N)

6. Was incremental analysis performed between alternatives for resources and costs? (Y/N)

7. Was the methodology for data abstraction (including the value of health states and other benefits) stated? (Y/N)

8. Did the analytic horizon allow time for all relevant and important outcomes? Were benefits and costs that went beyond 1 year discounted (3%-5%) and justification given for the discount rate? (Y/N)

9. Was the measurement of costs appropriate and the methodology for the estimation of quantities and unit costs clearly described? (Y/N)

10. Were the primary outcome measure (s) for the economic evaluation clearly stated and did they include the major short-term. Was justification given for the measures/scales used? (Y/N)

11. Were the health outcomes measures/scales valid and reliable? If previously tested valid and reliable measures were not available, was justification given for measures and scales used? (Y/N)

12. Were the economic model (including structure), study methods and analysis, and the components of numerator and denominator displayed in a clear, transparent manner? (Y/N)

13. Were the choice of economic model, main assumptions, and limitations if the study stated and justified? (Y/N)

14. Did the author (s) explicitly discuss direction and magnitude of potential biases? (Y/N)

15. Were the conclusions/recommendations of the study justified and based on the study results? (Y/N)

16. Was there a statement disclosing the source of funding for the study? (Y/N)

|                       |                                 |   |   |   |   |   |   |   |   |   |   |   |   |   |   |   |   |    |        |
|-----------------------|---------------------------------|---|---|---|---|---|---|---|---|---|---|---|---|---|---|---|---|----|--------|
| Supplemental material | Coomar<br>asamy,<br>A<br>(2016) | 7 | 0 | 8 | 0 | 9 | 6 | 5 | 7 | 8 | 6 | 7 | 8 | 7 | 6 | 8 | 3 | 95 | High   |
|                       | Carolann<br>-Rees, G<br>(2015)  | 7 | 0 | 0 | 0 | 9 | 0 | 0 | 7 | 8 | 6 | 0 | 8 | 0 | 0 | 8 | 3 | 56 | Medium |
|                       | Lain, SJ<br>(2017)              | 7 | 0 | 8 | 0 | 9 | 6 | 0 | 7 | 8 | 6 | 7 | 8 | 0 | 0 | 8 | 3 | 77 | High   |
|                       | Parisaei<br>, M<br>(2016)       | 0 | 0 | 0 | 0 | 0 | 6 | 0 | 7 | 8 | 0 | 7 | 8 | 0 | 0 | 8 | 3 | 47 | Low    |
|                       | Ussher,<br>M<br>(2015)          | 7 | 4 | 8 | 0 | 9 | 6 | 0 | 7 | 8 | 6 | 7 | 8 | 7 | 6 | 8 | 3 | 94 | High   |
|                       | Walker,<br>KF<br>(2017)         | 7 | 0 | 8 | 0 | 9 | 6 | 5 | 7 | 8 | 6 | 7 | 8 | 7 | 6 | 8 | 3 | 95 | High   |
|                       |                                 |   |   |   |   |   |   |   |   |   |   |   |   |   |   |   |   |    |        |
|                       |                                 |   |   |   |   |   |   |   |   |   |   |   |   |   |   |   |   |    |        |
|                       |                                 |   |   |   |   |   |   |   |   |   |   |   |   |   |   |   |   |    |        |
|                       |                                 |   |   |   |   |   |   |   |   |   |   |   |   |   |   |   |   |    |        |
|                       |                                 |   |   |   |   |   |   |   |   |   |   |   |   |   |   |   |   |    |        |
|                       |                                 |   |   |   |   |   |   |   |   |   |   |   |   |   |   |   |   |    |        |
|                       |                                 |   |   |   |   |   |   |   |   |   |   |   |   |   |   |   |   |    |        |
|                       |                                 |   |   |   |   |   |   |   |   |   |   |   |   |   |   |   |   |    |        |
|                       |                                 |   |   |   |   |   |   |   |   |   |   |   |   |   |   |   |   |    |        |
|                       |                                 |   |   |   |   |   |   |   |   |   |   |   |   |   |   |   |   |    |        |
| Overall assessment    |                                 |   |   |   |   |   |   |   |   |   |   |   |   |   |   |   |   |    |        |

|                                                                                                                                                                                                                                                                                                                                                                                                                                                                                                                                                                                                                                                                                                                                                                                                                                                                                                                                                                                                                                                                                                                                                                                                                                                                                                                                                                                                                                                                                                                                                                                                                                                                                                                                                                                                                                                                                                                                                                                                                                                                                                                                                                                                                                  |   |   |   |   |   |   |   |   |   |   |   |   |   |   |   |   |    |        |
|----------------------------------------------------------------------------------------------------------------------------------------------------------------------------------------------------------------------------------------------------------------------------------------------------------------------------------------------------------------------------------------------------------------------------------------------------------------------------------------------------------------------------------------------------------------------------------------------------------------------------------------------------------------------------------------------------------------------------------------------------------------------------------------------------------------------------------------------------------------------------------------------------------------------------------------------------------------------------------------------------------------------------------------------------------------------------------------------------------------------------------------------------------------------------------------------------------------------------------------------------------------------------------------------------------------------------------------------------------------------------------------------------------------------------------------------------------------------------------------------------------------------------------------------------------------------------------------------------------------------------------------------------------------------------------------------------------------------------------------------------------------------------------------------------------------------------------------------------------------------------------------------------------------------------------------------------------------------------------------------------------------------------------------------------------------------------------------------------------------------------------------------------------------------------------------------------------------------------------|---|---|---|---|---|---|---|---|---|---|---|---|---|---|---|---|----|--------|
| van der<br>Nelson,<br>H<br>(2017)                                                                                                                                                                                                                                                                                                                                                                                                                                                                                                                                                                                                                                                                                                                                                                                                                                                                                                                                                                                                                                                                                                                                                                                                                                                                                                                                                                                                                                                                                                                                                                                                                                                                                                                                                                                                                                                                                                                                                                                                                                                                                                                                                                                                | 7 | 4 | 8 | 0 | 9 | 6 | 5 | 7 | 8 | 6 | 7 | 8 | 7 | 6 | 8 | 3 | 99 | High   |
| Bick, D<br>(2017)                                                                                                                                                                                                                                                                                                                                                                                                                                                                                                                                                                                                                                                                                                                                                                                                                                                                                                                                                                                                                                                                                                                                                                                                                                                                                                                                                                                                                                                                                                                                                                                                                                                                                                                                                                                                                                                                                                                                                                                                                                                                                                                                                                                                                | 7 | 0 | 8 | 0 | 9 | 6 | 5 | 7 | 8 | 6 | 7 | 8 | 7 | 6 | 8 | 3 | 95 | High   |
| Campbell,<br>H, HE<br>(2018)                                                                                                                                                                                                                                                                                                                                                                                                                                                                                                                                                                                                                                                                                                                                                                                                                                                                                                                                                                                                                                                                                                                                                                                                                                                                                                                                                                                                                                                                                                                                                                                                                                                                                                                                                                                                                                                                                                                                                                                                                                                                                                                                                                                                     | 7 | 4 | 0 | 0 | 9 | 0 | 0 | 0 | 8 | 6 | 0 | 8 | 7 | 6 | 8 | 3 | 66 | Medium |
| Duckworth,<br>S<br>(2016)                                                                                                                                                                                                                                                                                                                                                                                                                                                                                                                                                                                                                                                                                                                                                                                                                                                                                                                                                                                                                                                                                                                                                                                                                                                                                                                                                                                                                                                                                                                                                                                                                                                                                                                                                                                                                                                                                                                                                                                                                                                                                                                                                                                                        | 7 | 4 | 0 | 1 | 9 | 6 | 0 | 7 | 8 | 6 | 7 | 8 | 7 | 6 | 8 | 3 | 87 | High   |
| Orlovic,<br>M<br>(2017)                                                                                                                                                                                                                                                                                                                                                                                                                                                                                                                                                                                                                                                                                                                                                                                                                                                                                                                                                                                                                                                                                                                                                                                                                                                                                                                                                                                                                                                                                                                                                                                                                                                                                                                                                                                                                                                                                                                                                                                                                                                                                                                                                                                                          | 7 | 0 | 8 | 0 | 9 | 0 | 0 | 7 | 8 | 6 | 7 | 8 | 7 | 6 | 8 | 3 | 84 | High   |
| Vatish,<br>M<br>(2016)                                                                                                                                                                                                                                                                                                                                                                                                                                                                                                                                                                                                                                                                                                                                                                                                                                                                                                                                                                                                                                                                                                                                                                                                                                                                                                                                                                                                                                                                                                                                                                                                                                                                                                                                                                                                                                                                                                                                                                                                                                                                                                                                                                                                           | 7 | 4 | 0 | 0 | 9 | 6 | 0 | 7 | 8 | 6 | 7 | 8 | 7 | 0 | 8 | 0 | 77 | High   |
| Total (Max 100)                                                                                                                                                                                                                                                                                                                                                                                                                                                                                                                                                                                                                                                                                                                                                                                                                                                                                                                                                                                                                                                                                                                                                                                                                                                                                                                                                                                                                                                                                                                                                                                                                                                                                                                                                                                                                                                                                                                                                                                                                                                                                                                                                                                                                  |   |   |   |   |   |   |   |   |   |   |   |   |   |   |   |   |    |        |
| Overall assessment                                                                                                                                                                                                                                                                                                                                                                                                                                                                                                                                                                                                                                                                                                                                                                                                                                                                                                                                                                                                                                                                                                                                                                                                                                                                                                                                                                                                                                                                                                                                                                                                                                                                                                                                                                                                                                                                                                                                                                                                                                                                                                                                                                                                               |   |   |   |   |   |   |   |   |   |   |   |   |   |   |   |   |    |        |
| 1. Was the study objective presented in a clear, specific and measurable manner? (Y/N)<br>2. Were the perspective of the analysis (societal, third-party payer, etc) and reasons for its selection stated? (Y/N)<br>3. Were variable estimates used in the analysis from the best available source (i.e randomized control trial - best, expert opinion - worst)? (Y/N)<br>4. If estimates came from a subgroup analysis, were the groups prespecified in the beginning of the study? (Y/N)<br>5. Was uncertainty handled by (1) statistical analysis to address random events, (2) sensitivity analysis to cover a range of assumptions? (Y/N)<br>6. Was incremental analysis performed between alternatives for resources and costs? (Y/N)<br>7. Was the methodology for data abstraction (including the value of health states and other benefits) stated? (Y/N)<br>8. Did the analytic horizon allow time for all relevant and important outcomes? Were benefits and costs that went beyond 1 year discounted (3%-5%) and justification given for the discount rate? (Y/N)<br>9. Was the measurement of costs appropriate and the methodology for the estimation of quantities and unit costs clearly described? (Y/N)<br>10. Were the primary outcome measure (s) for the economic evaluation clearly stated and did they include the major short-term. Was justification given for the measures/scales used? (Y/N)<br>11. Were the health outcomes measures/scales valid and reliable? If previously tested valid and reliable measures were not available, was justification given for measures and scales used? (Y/N)<br>12. Were the economic model (including structure), study methods and analysis, and the components of numerator and denominator displayed in a clear, transparent manner? (Y/N)<br>13. Were the choice of economic model, main assumptions, and limitations if the study stated and justified? (Y/N)<br>14. Did the author (s) explicitly discuss direction and magnitude of potential biases? (Y/N)<br>15. Were the conclusions/recommendations of the study justified and based on the study results? (Y/N)<br>16. Was there a statement disclosing the source of funding for the study? (Y/N) |   |   |   |   |   |   |   |   |   |   |   |   |   |   |   |   |    |        |



Wastlund  
d, D  
(2019 -  
BJOG)  
Wastlund  
d, D  
(2019 -  
PLOS  
Med)

1. Was the study objective presented in a clear, specific and measurable manner? (Y/N)

7

7

2. Were the perspective of the analysis (societal, third-party payer, etc) and reasons for its selection stated? (Y/N)

0

0

3. Were variable estimates used in the analysis from the best available source (i.e randomized control trial - best, expert opinion - worst)? (Y/N)

0

0

4. If estimates came from a subgroup analysis, were the groups prespecified in the beginning of the study? (Y/N)

0

0

5. Was uncertainty handled by (1) statistical analysis to address random events, (2) sensitivity analysis to cover a range of assumptions? (Y/N)

9

9

6. Was incremental analysis performed between alternatives for resources and costs? (Y/N)

6

6

7. Was the methodology for data abstraction (including the value of health states and other benefits) stated? (Y/N)

5

5

8. Did the analytic horizon allow time for all relevant and important outcomes? Were benefits and costs that went beyond 1 year discounted (3%-5%) and justification given for the discount rate? (Y/N)

7

7

9. Was the measurement of costs appropriate and the methodology for the estimation of quantities and unit costs clearly described? (Y/N)

8

8

10. Were the primary outcome measure (s) for the economic evaluation clearly stated and did they include the major short-term. Was justification given for the measures/scales used? (Y/N)

6

6

11. Were the health outcomes measures/scales valid and reliable? If previously tested valid and reliable measures were not available, was justification given for measures and scales used? (Y/N)

7

7

12. Were the economic model (including structure), study methods and analysis, and the components of numerator and denominator displayed in a clear, transparent manner? (Y/N)

8

8

13. Were the choice of economic model, main assumptions, and limitations if the study stated and justified? (Y/N)

7

7

14. Did the author (s) explicitly discuss direction and magnitude of potential biases? (Y/N)

6

0

15. Were the conclusions/recommendations of the study justified and based on the study results? (Y/N)

8

8

16. Was there a statement disclosing the source of funding for the study? (Y/N)

3

3

Total (Max 100)

87

81

High

High

Overall assessment
